# Supplementary material for: Overcoming resistance to αPD-1 of MMR-deficient tumors with high tumor-induced neutrophils levels by combination of αCTLA-4 and αPD-1 blockers
Source: HighWire-hosted journal article supplement (doi:10.1136/jitc-2022-005059), 2022-07-01
Supplement: jitc-2022-005059supp002_data_supplement.xlsx [file jitc-2022-005059supp002_data_supplement.xlsx]

## Sheet: Sheet1
#Patient Number	Age (year)	Sex	Tumor type	Trial	NCT	Inclusion/exclusion criteria	treatment	treatment2 (if combo)
1	64.4682	F	Endometrial	MK3475-158	NCT02628067	https://www.clinicaltrials.gov/ct2/show/NCT02628067	anti-PD1 (Pembrolizumab)
2	47.2142	M	Surenal gland	I8J-MC-JYCA	NCT02791334	https://clinicaltrials.gov/ct2/show/NCT02791334	anti-PDL1 (LY3300054)
3	36.0383	F	Brain	MK3475-158	NCT02628067	https://www.clinicaltrials.gov/ct2/show/NCT02628068	anti-PD1 (Pembrolizumab)
4	72.4709	F	Ovarian	I8J-MC-JYCA	NCT02791334	https://clinicaltrials.gov/ct2/show/NCT02791335	anti-PDL1 (LY3300054)
5	51.4689	M	Colon	MEDI4736	NCT01693562	https://www.clinicaltrials.gov/ct2/show/NCT01375843	anti-PDL1 (durvalumab)
6	66.7926	F	Endometrial	MK3475-158	NCT02628067	https://www.clinicaltrials.gov/ct2/show/NCT02628069	anti-PD1 (Pembrolizumab)
7	58.1492	M	Colon	PEMBIB	NCT02856425	https://clinicaltrials.gov/ct2/show/NCT02856425	anti-PD1 (Pembrolizumab)	Nintedanib
8	59.9726	M	Colon	I8J-MC-JYCA	NCT02791334	https://clinicaltrials.gov/ct2/show/NCT02791336	anti-PDL1 (LY3300054)
11	70.4942	F	Biliary tract	MK3475-158	NCT02628067	https://www.clinicaltrials.gov/ct2/show/NCT02628070	anti-PD1 (Pembrolizumab)
12	58.412	F	brain	MK3475-158	NCT02628067	https://www.clinicaltrials.gov/ct2/show/NCT02628071	anti-PD1 (Pembrolizumab)
13	35.0828	F	brain	MK3475-158	NCT02628067	https://www.clinicaltrials.gov/ct2/show/NCT02628072	anti-PD1 (Pembrolizumab)
14	60.6407	F	Endometrial	MK3475-158	NCT02628067	https://www.clinicaltrials.gov/ct2/show/NCT02628073	anti-PD1 (Pembrolizumab)
15	51.321	M	Colon	GSK201212	NCT02723955	https://clinicaltrials.gov/ct2/show/NCT02723955	anti-PD1 (Pembrolizumab)	anti-Ox40
16	66.9897	F	Endometrial	MK3475-158	NCT02628067	https://www.clinicaltrials.gov/ct2/show/NCT02628074	anti-PD1 (Pembrolizumab)
17	57.514	M	Colon	MEDI4736	NCT01693562	https://www.clinicaltrials.gov/ct2/show/NCT01375844	anti-PDL1 (durvalumab)
18	60.0986	F	Endometrial	MK3475-158	NCT02628067	https://www.clinicaltrials.gov/ct2/show/NCT02628075	anti-PD1 (Pembrolizumab)
19	49.3854	M	head	MK3475-158	NCT02628067	https://www.clinicaltrials.gov/ct2/show/NCT02628076	anti-PD1 (Pembrolizumab)
20	72.5667	F	Small intestine	MK3475-158	NCT02628067	https://www.clinicaltrials.gov/ct2/show/NCT02628077	anti-PD1 (Pembrolizumab)
21	79.2827	F	Endometrial	MK3475-158	NCT02628067	https://www.clinicaltrials.gov/ct2/show/NCT02628078	anti-PD1 (Pembrolizumab)
22	60.2163	M	Colon	MEDI4736	NCT01693562	https://www.clinicaltrials.gov/ct2/show/NCT01375845	anti-PDL1 (durvalumab)
23	69.911	F	Endometrial	MEDI4736	NCT01693562	https://www.clinicaltrials.gov/ct2/show/NCT01375846	anti-PDL1 (durvalumab)
24	82.3518	M	Small intestine	MK3475-158	NCT02628067	https://www.clinicaltrials.gov/ct2/show/NCT02628079	anti-PD1 (Pembrolizumab)
25	49.4867	M	Pancreas	MK3475-158	NCT02628067	https://www.clinicaltrials.gov/ct2/show/NCT02628080	anti-PD1 (Pembrolizumab)
26	31.8467	M	Colon	MEDI4736	NCT01693562	https://www.clinicaltrials.gov/ct2/show/NCT01375847	anti-PDL1 (durvalumab)
27	64.668	M	Colon	MEDI4736	NCT01693562	https://www.clinicaltrials.gov/ct2/show/NCT01375848	anti-PDL1 (durvalumab)
28	75.2005	M	Colon	MEDI4736	NCT01693562	https://www.clinicaltrials.gov/ct2/show/NCT01375849	anti-PDL1 (durvalumab)
29	37.8727	M	Colon	MEDI4736	NCT01693562	https://www.clinicaltrials.gov/ct2/show/NCT01375850	anti-PDL1 (durvalumab)
30	38.3299	F	Colon	MEDI4736	NCT01693562	https://www.clinicaltrials.gov/ct2/show/NCT01375851	anti-PDL1 (durvalumab)
31	54.5161	F	Colon	I8J-MC-JYCA	NCT02791334	https://clinicaltrials.gov/ct2/show/NCT02791337	anti-PDL1 (LY3300054)
32	80.1095	F	Colon	MEDI4736	NCT01693562	https://www.clinicaltrials.gov/ct2/show/NCT01375852	anti-PDL1 (durvalumab)
33	47.321	F	Ovarian	MEDI4736	NCT01693562	https://www.clinicaltrials.gov/ct2/show/NCT01375853	anti-PDL1 (durvalumab)
34	69.3689	M	Pancreas	I8J-MC-JYCA	NCT02791334	https://clinicaltrials.gov/ct2/show/NCT02791338	anti-PDL1 (LY3300054)
35	34.9788	M	Colon	I8J-MC-JYCA	NCT02791334	https://clinicaltrials.gov/ct2/show/NCT02791339	anti-PDL1 (LY3300054)
36	37.3689	M	Colon	I8J-MC-JYCA	NCT02791334	https://clinicaltrials.gov/ct2/show/NCT02791340	anti-PDL1 (LY3300054)	Anti-TIM3
37	79.718	F	Endometrial	MEDI4736	NCT01693562	https://www.clinicaltrials.gov/ct2/show/NCT01375854	anti-PDL1 (durvalumab)
38	67.6167	M	prostate	PCD4989	NCT01375842	https://www.clinicaltrials.gov/ct2/show/NCT01375842	anti-PDL1 (Atezolizumab)
39	39.9671	F	Colon	I8J-MC-JYCA	NCT02791334	https://clinicaltrials.gov/ct2/show/NCT02791341	anti-PDL1 (LY3300054)
40	61.7029	F	Colon	GSK201212	NCT02723955	https://clinicaltrials.gov/ct2/show/NCT02723956	anti-PD1 (Pembrolizumab)	anti-Ox40
41	68.6626	F	Endometrial	Acse Nivolumab	NCT03012581	https://clinicaltrials.gov/ct2/show/NCT03012581	Anti-PD1 (Nivolumab)
42	72.0137	F	Colon	SABR	NCT02992912	https://clinicaltrials.gov/ct2/show/NCT02992912	anti-PDL1 (Atezolizumab)
43	60.0329	F	Endometrial	MEDI4736	NCT01693562	https://www.clinicaltrials.gov/ct2/show/NCT01375855	anti-PDL1 (durvalumab)
44	59.5619	F	Small intestine	I8J-MC-JYCA	NCT02791334	https://clinicaltrials.gov/ct2/show/NCT02791342	anti-PDL1 (LY3300054)
45	70.2615	F	Colon	BP29382	NCT02304393	https://clinicaltrials.gov/ct2/show/NCT02304393	anti-PDL1 (Atezolizumab)	CD40 agnonist
46	50.371	F	brain	MK3475-158	NCT02628067	https://www.clinicaltrials.gov/ct2/show/NCT02628081	anti-PD1 (Pembrolizumab)
47	32.0931	M	brain	MK3475-158	NCT02628067	https://www.clinicaltrials.gov/ct2/show/NCT02628082	anti-PD1 (Pembrolizumab)
48	27.7344	F	brain	MK3475-158	NCT02628067	https://www.clinicaltrials.gov/ct2/show/NCT02628083	anti-PD1 (Pembrolizumab)
49	72.4107	M	gastric	Acse Nivolumab	NCT03012581	https://clinicaltrials.gov/ct2/show/NCT03012582	Anti-PD1 (Nivolumab)
51	76.1068	F	Endometrial	compassionate use	NA	NA	Anti-PD1 (Nivolumab)
53	46.8939	F	Colon	GSK201212	NCT02723955	https://clinicaltrials.gov/ct2/show/NCT02723957	anti-PD1 (Pembrolizumab)	anti-Ox40
54	28.9692	M	Colon	GSK201212	NCT02723955	https://clinicaltrials.gov/ct2/show/NCT02723958	anti-PD1 (Pembrolizumab)	anti-Ox40
55	72.9473	F	Endometrial	Acse Nivolumab	NCT03012581	https://clinicaltrials.gov/ct2/show/NCT03012583	Anti-PD1 (Nivolumab)
56	50.7324	F	colon	Acse Nivolumab	NCT03012581	https://clinicaltrials.gov/ct2/show/NCT03012584	Anti-PD1 (Nivolumab)
57	68.0493	F	Endometrial	Acse Nivolumab	NCT03012581	https://clinicaltrials.gov/ct2/show/NCT03012585	Anti-PD1 (Nivolumab)
58	66.0178	M	Small intestine	Acse Nivolumab	NCT03012581	https://clinicaltrials.gov/ct2/show/NCT03012586	Anti-PD1 (Nivolumab)
59	74.8063	M	gastric	Acse Nivolumab	NCT03012581	https://clinicaltrials.gov/ct2/show/NCT03012587	Anti-PD1 (Nivolumab)
60	66.6366	M	Prostate	Acse Nivolumab	NCT03012581	https://clinicaltrials.gov/ct2/show/NCT03012588	Anti-PD1 (Nivolumab)
61	69.1088	F	colon	compassionate use	NA	NA	Anti-PD1 (Nivolumab)
62	72.386	F	gastric	GARNET 4010-01-001	NCT02715284	https://clinicaltrials.gov/ct2/show/NCT02715284	Anti-PD1 (dostarlimab)
63	74.4394	M	prostate	I8J-MC-JYCA	NCT02791334	https://clinicaltrials.gov/ct2/show/NCT02791343	anti-PDL1 (LY3300054)
64	64.8131	F	colon	I8J-MC-JYCA	NCT02791334	https://clinicaltrials.gov/ct2/show/NCT02791344	anti-PDL1 (LY3300054)
65	66.0808	F	Small intestine	I8J-MC-JYCA	NCT02791334	https://clinicaltrials.gov/ct2/show/NCT02791345	anti-PDL1 (LY3300054)
66	69.2211	M	gastric	I8J-MC-JYCA	NCT02791334	https://clinicaltrials.gov/ct2/show/NCT02791346	anti-PDL1 (LY3300054)
67	70.0917	M	colon	INDUCE-1	NCT02723955	https://clinicaltrials.gov/ct2/show/NCT02723959	anti-PD1 (Pembrolizumab)	anti-ICOS
68	54.7515	M	colorectal	Keynote-177	NCT02563002	https://clinicaltrials.gov/ct2/show/NCT02563002	anti-PD1 (Pembrolizumab)
69	66.2177	F	Endometrial	I8J-MC-JYCA	NCT02791334	https://clinicaltrials.gov/ct2/show/NCT02791347	anti-PDL1 (LY3300054)
70	78.7461	F	colon	INDUCE-1	NCT02723955	https://clinicaltrials.gov/ct2/show/NCT02723960	anti-PD1 (Pembrolizumab)	anti-ICOS
71	68.4901	M	colon	INDUCE-1	NCT02723955	https://clinicaltrials.gov/ct2/show/NCT02723961	anti-PD1 (Pembrolizumab)	anti-ICOS
72	53.9904	F	colon	I8J-MC-JYCA	NCT02791334	https://clinicaltrials.gov/ct2/show/NCT02791348	anti-PDL1 (LY3300054)
73	64.1259	F	Endometrial	I8J-MC-JYCA	NCT02791334	https://clinicaltrials.gov/ct2/show/NCT02791349	anti-PDL1 (LY3300054)
74	120.909	M	gastric	I8J-MC-JYCA	NCT02791334	https://clinicaltrials.gov/ct2/show/NCT02791350	anti-PDL1 (LY3300054)
75	71.3429	M	colon	I8J-MC-JYCA	NCT02791334	https://clinicaltrials.gov/ct2/show/NCT02791351	anti-PDL1 (LY3300054)
76	64.219	F	Endometrial	MK3475-158	NCT02628067	https://www.clinicaltrials.gov/ct2/show/NCT02628084	anti-PD1 (Pembrolizumab)
77	70.6831	F	Endometrial	compassionate use	NA	NA	Anti-PD1 (Nivolumab)
78	71.4168	M	Gastric	Javelin-Gastric300	NCT02625623	https://clinicaltrials.gov/ct2/show/NCT02625623	anti-PDL1 (avelumab)
79	72.8378	M	Gastric	MK3475-158	NCT02628067	https://www.clinicaltrials.gov/ct2/show/NCT02628085	anti-PD1 (Pembrolizumab)
80	63.6879	M	brain	MK3475-158	NCT02628067	https://www.clinicaltrials.gov/ct2/show/NCT02628086	anti-PD1 (Pembrolizumab)
81	58.0753	F	brain	MK3475-158	NCT02628067	https://www.clinicaltrials.gov/ct2/show/NCT02628087	anti-PD1 (Pembrolizumab)
82	66.5489	F	Endometrial	compassionate use	NA	NA	Anti-PD1 (Nivolumab)
83	63.8905	F	Endometrial	INCMGA00012	NCT03059823	https://clinicaltrials.gov/ct2/show/NCT03059823	anti-PD1 (INCMGA00012)
84	65.4237	F	colon	INCMGA00012	NCT03059823	https://clinicaltrials.gov/ct2/show/NCT03059824	anti-PD1 (INCMGA00012)
85	55.0418	M	colon	CA209-I8KX	NA	NA	Anti-PD1 (Nivolumab)
86	70.527	F	Gall bladder	compassionate use	NA	NA	Anti-PD1 (Nivolumab)
87	42.8912	F	Gall bladder	compassionate use	NA	NA	Anti-PD1 (Nivolumab)
88	71.9343	M	Carcinoma of unknown primary (CUP)	compassionate use	NA	NA	Anti-PD1 (Nivolumab)
89	56.6133	M	dudodnum	compassionate use	NA	NA	Anti-PD1 (Pembrolizumab)
90	50.6612	F	Uterine cervix	BP40234	NA	https://clinicaltrials.gov/ct2/show/NCT03386721	anti-PDL1 (Atezolizumab)	FAP-IL2 simlukafusp alfa)
91	59.6085	M	Urothelial	XL-184	NA	https://clinicaltrials.gov/ct2/show/NCT03170960	anti-PDL1 (Atezolizumab)	cabozantinib
92	66.9158	M	lung	compassionate use	NA	NA	Anti-PD1 (Pembrolizumab)
93	73.525	F	Endometrial	INCMGA00012	NCT03059823	https://clinicaltrials.gov/ct2/show/NCT03059825	anti-PD1 (INCMGA00012)
94	59.6003	F	Endometrial	compassionate use	NA	NA	Anti-PD1 (Nivolumab)
95	63.2882	F	Endometrial	INCMGA00012	NCT03059823	https://clinicaltrials.gov/ct2/show/NCT03059826	anti-PD1 (INCMGA00012)
96	63.7618	F	Endometrial	compassionate use	NA	NA	Anti-PD1 (Nivolumab)
98	120.972	F	Endometrial	compassionate use	NA	NA	Anti-PD1 (Nivolumab)
99	66.5927	F	Endometrial	compassionate use	NA	NA	Anti-PD1 (Nivolumab)
100	57.6701	F	Endometrial	INCMGA00012	NCT03059823	https://clinicaltrials.gov/ct2/show/NCT03059827	anti-PD1 (INCMGA00012)
101	56.5585	F	Ovarian	MK3475-158	NCT02628067	https://www.clinicaltrials.gov/ct2/show/NCT02628088	anti-PD1 (Pembrolizumab)
102	51.9398	F	Endometrial	INCMGA00012	NCT03059823	https://clinicaltrials.gov/ct2/show/NCT03059828	anti-PD1 (INCMGA00012)
103	88.9802	F	Endometrial	INCMGA00012	NCT03059823	https://clinicaltrials.gov/ct2/show/NCT03059829	anti-PD1 (INCMGA00012)
104	73.9986	F	Endometrial	INCMGA00012	NCT03059823	https://clinicaltrials.gov/ct2/show/NCT03059830	anti-PD1 (INCMGA00012)
105	73.8125	M	œsophage	I8J-MC-JYCA	NCT02791334	https://clinicaltrials.gov/ct2/show/NCT02791352	anti-PDL1 (LY3300054)
106	48.3723	M	œsophage	I8J-MC-JYCA	NCT02791334	https://clinicaltrials.gov/ct2/show/NCT02791353	anti-PDL1 (LY3300054)
107	92.063	F	Gastric	BoB	NCT03767075	https://clinicaltrials.gov/ct2/show/NCT03767075	anti-PDL1 (Atezolizumab)
108	77.3224	F	colon	BoB	NCT03767075	https://clinicaltrials.gov/ct2/show/NCT03767075	anti-PDL1 (Atezolizumab)
109	74.3053	F	Endometrial	GARNET 4010-01-001	NCT02715284	https://clinicaltrials.gov/ct2/show/NCT02715284	Anti-PD1 (dostarlimab)
